# Supplementary material for: Phase engineered gallium ferrite: a promising narrow bandgap, room-temperature ferroelectric
Source: Royal Society of Chemistry journal article supplement (doi:10.1039/d2ma00089j), 2022-01-01
Supplement: d2ma00089j1.pdf [file d2ma00089j1.pdf]

## Supplementary Information

### Phase engineered gallium ferrite: a promising narrow bandgap, room-temperature ferroelectric

Somdutta Mukherjee<sup>1,†</sup>, Monali Mishra<sup>1,2</sup>, Palash Swarnakar<sup>3</sup>, Shilpa Sanwani,<sup>4</sup> Sukalyan Das<sup>2</sup>, Amritendu Roy<sup>3,†</sup>

<sup>1</sup> Materials Chemistry Department, CSIR-IMMT Bhubaneswar, Bhubaneswar-751013, Orissa, India

<sup>2</sup> Department of Chemistry, VSSUT Burla, Burla-768018, India

<sup>3</sup> School of Minerals, Metallurgical and Materials Engineering, Indian Institute of Technology Bhubaneswar, Jatni-752050, Orissa, India

<sup>4</sup> Department of Physics, Indian Institute of Science, Education and Research Mohali, Punjab, India

\*Corresponding Authors: [msomdutta@gmail.com](mailto:msomdutta@gmail.com); [amritendu@iitbbs.ac.in](mailto:amritendu@iitbbs.ac.in)

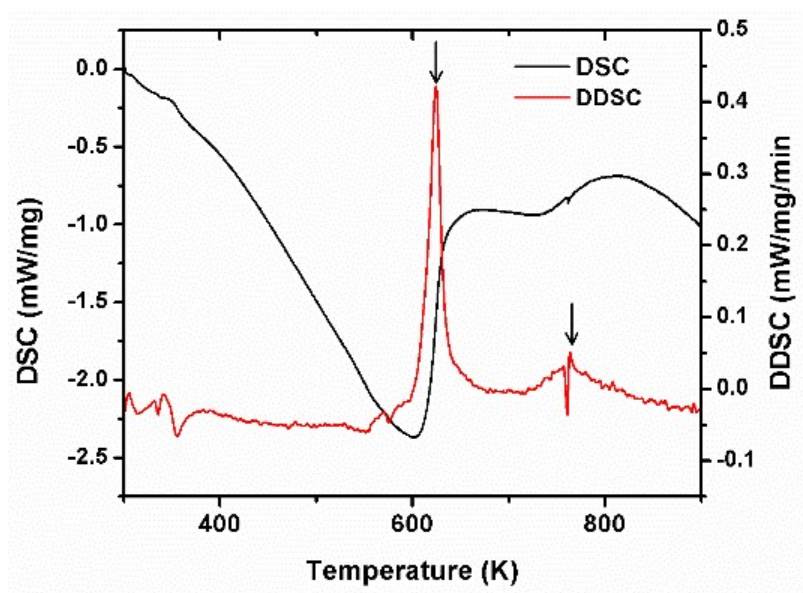

Figure S1: Differential scanning calorimetry of gallium ferrite nanocrystals with  $P2_12_12_1$  symmetry produced in our previous study [26]. Presence of a prominent endothermic peak, which is also clear from the differential DSC signal, indicates presence of structural phase transformation across,  $\sim 620$  K.

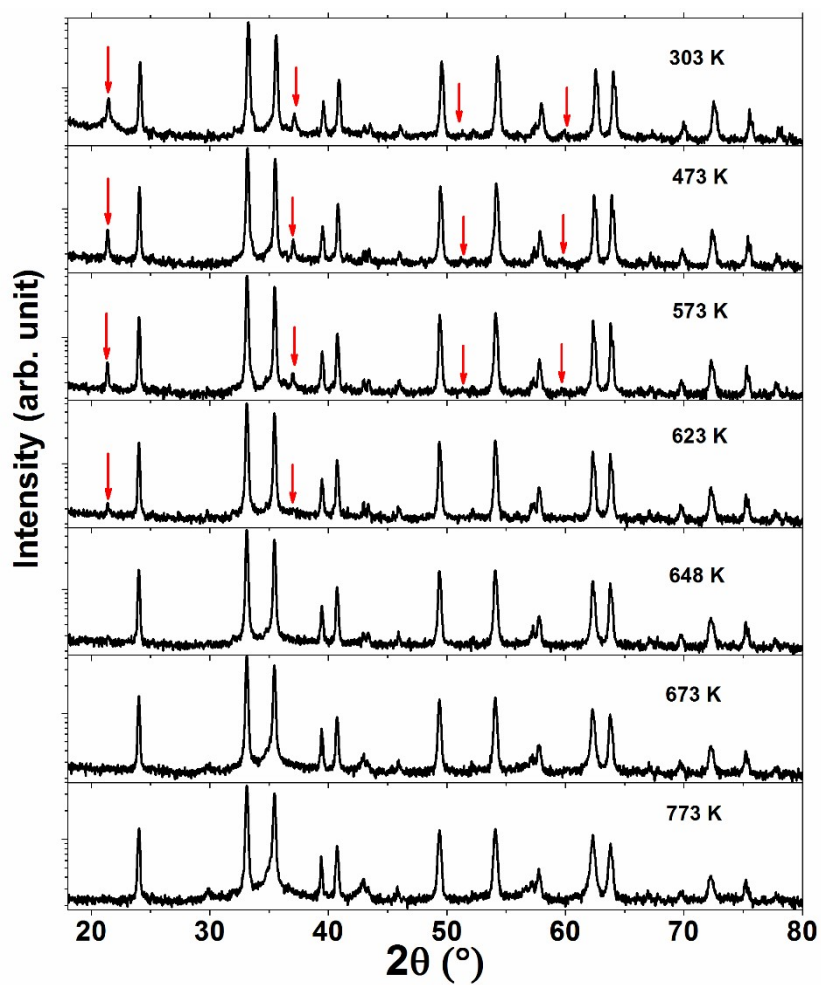

Figure S2: Temperature dependent XRD study of as synthesized GFO nanocrystals with  $P2_12_12_1$  symmetry produced in our previous study. <sup>[26]</sup> With increasing temperature the peaks marked by arrows disappeared beyond 623 K, suggesting symmetry increasing structural phase transition.

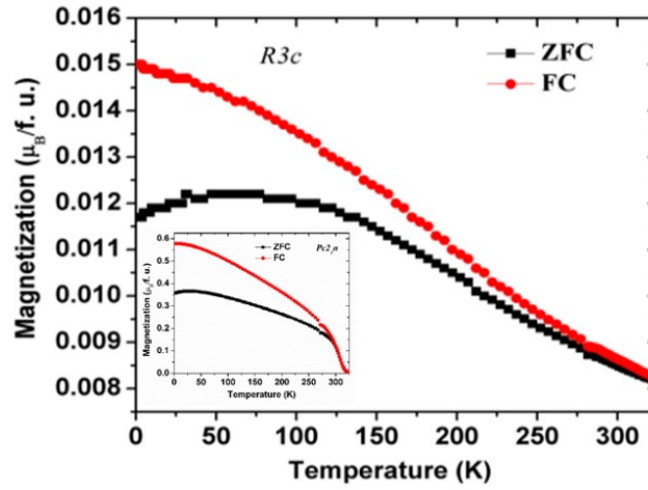

Figure S3: Magnetization plotted as a function of temperature measured on *R3c*-GFO nanocrystals with a probing field of 100 Oe, demonstrating weak magnetic characteristics. Inset shows corresponding magnetization data of sample with bulk symmetry, *Pna2<sub>1</sub>*.

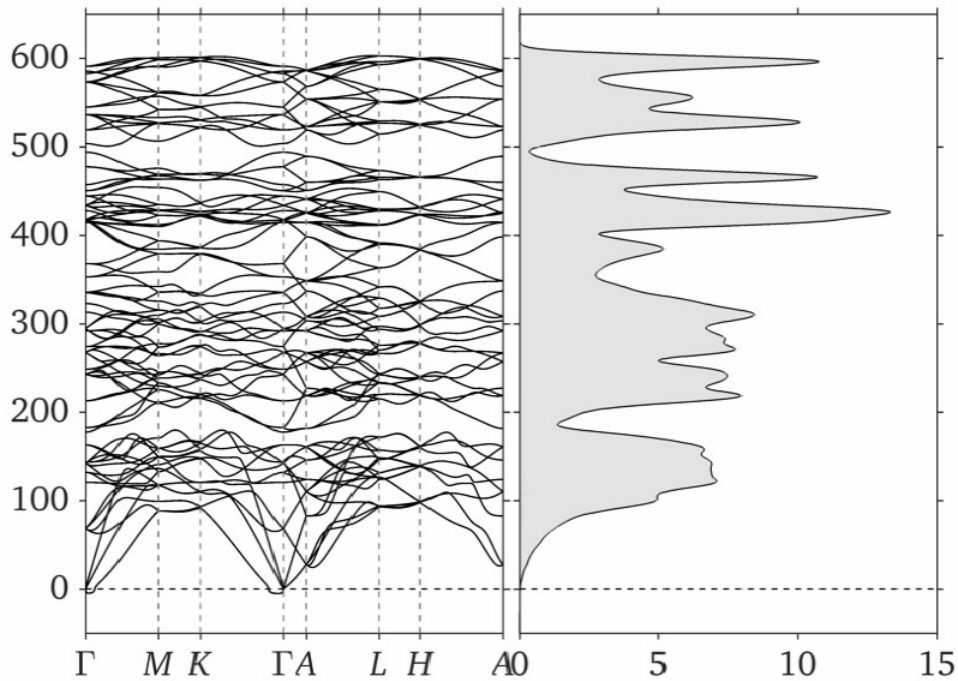

Figure S4: Phonon dispersion curve and phonon density of states of *R3c*-GFO phase computed using density functional perturbation theory as implemented in Phonopy.<sup>[1]</sup>

<sup>[1]</sup> A. Togo and I. Tanaka, Scr. Mater., **2015**, **108**, 1-5.
